# Supplementary material for: Breast cancer cell-based ELISA: a potential material for better detection of heparin-induced thrombocytopenia antibodies
Source: Royal Society of Chemistry journal article supplement (doi:10.1039/d2tb01228f), 2022-01-01
Supplement: d2tb01228f1.pdf [file d2tb01228f1.pdf]

### Supplementary Information

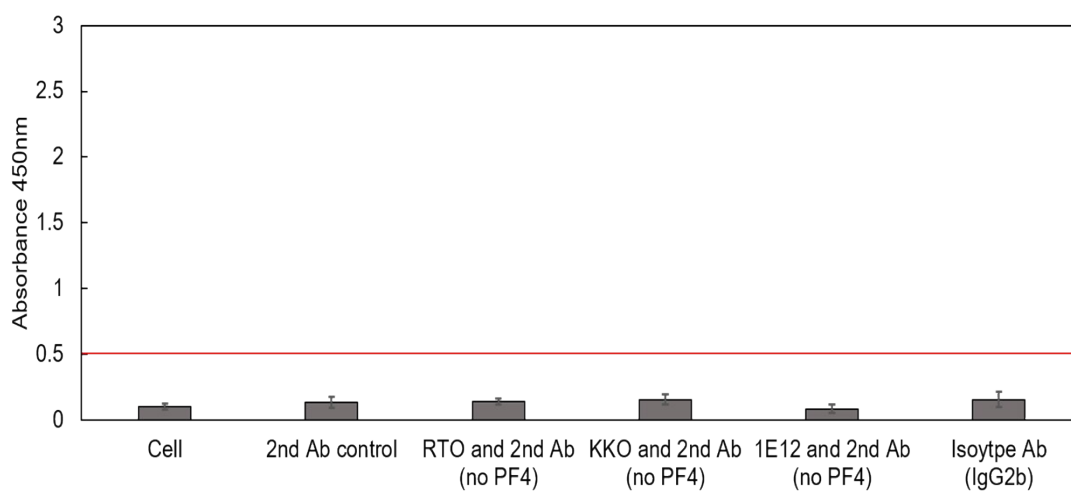

**Supplement Fig. 1 Controls for cell based-ELISA.** Cells alone, cells treated only with 2<sup>nd</sup> antibody, cells treated with HIT antibodies, 2<sup>nd</sup> antibodies but without PF4 or PF4/H, and cells treated with PF4, followed with isotype IgG2b antibody with 2<sup>nd</sup> antibody all showed low OD value from 0.1 to 0.15
